# Supplementary material
Source: publisher site journal article supplement (https://www.dovepress.com/article/530251)
Supplement: Supplementary file 1 [file 530251%20Revised%20Supplementary%20Table%201.docx]

Supplementary Table 1: The results of the power analysis

| Alpha value  (Type I error) | Beta value  (Type II error) | Power value  (1 - Beta value) | Sample size |
| --- | --- | --- | --- |
| 0.05 | 0.122 | 0.878 | 126.000 |
